# Supplementary material for: Cellular pyrimidine imbalance triggers mitochondrial DNA–dependent innate immunity
Source: PubMed Central journal article supplement (PMC8144018; doi:10.1038/s42255-021-00385-9), 2021-04-26
Supplement: 42255_2021_385_MOESM1_ESM.pdf [file 42255_2021_385_MOESM1_ESM.pdf]

---

**Supplementary information**

---

**Cellular pyrimidine imbalance triggers  
mitochondrial DNA–dependent innate  
immunity**

---

In the format provided by the  
authors and unedited

## Supplementary Information

### **Cellular pyrimidine imbalance triggers mitochondrial DNA-dependent innate immunity**

Hans-Georg Sprenger<sup>1,2,†</sup>, Thomas MacVicar<sup>1,†</sup>, Amir Bahat<sup>1</sup>, Kai Uwe Fiedler<sup>1</sup>, Steffen Hermans<sup>1</sup>, Denise Ehrentraut<sup>1</sup>, Katharina Ried<sup>1</sup>, Dusanka Milenkovic<sup>1</sup>, Nina Bonekamp<sup>1</sup>, Nils-Göran Larsson<sup>1,3</sup>, Hendrik Nolte<sup>1</sup>, Patrick Giavalisco<sup>1</sup>, and Thomas Langer<sup>1,2,\*</sup>

<sup>1</sup>Max Planck Institute for Biology of Ageing, Cologne, Germany

<sup>2</sup>Cologne Excellence Cluster on Cellular Stress Responses in Aging-Associated Diseases (CECAD), University of Cologne, Cologne, Germany

<sup>3</sup>Department of Medical Biochemistry and Biophysics, Karolinska Institutet, Stockholm, Sweden

†These authors contributed equally

Correspondence to: [TLanger@age.mpg.de](mailto:TLanger@age.mpg.de)

**Supplementary Table 1: Metabolomics data.**

Separate Excel file

**Supplementary Table 2: esiRNAs / siRNAs used.**

| Human Gene / Target | ID        | Company | Type   |
|---------------------|-----------|---------|--------|
| Gfp                 | EHUEGFP   | Sigma   | esiRNA |
| SLC25A33            | EHU160961 | Sigma   | esiRNA |
| CAD                 | EHU130441 | Sigma   | esiRNA |

| Mouse Gene / Target               | ID                 | Company    | Type   |
|-----------------------------------|--------------------|------------|--------|
| Scrambled (Scr, negative control) | SIC001-10nmol      | Sigma      | siRNA  |
| cGas                              | SASI_Mm01_00129826 | Sigma      | siRNA  |
| Sting                             | SASI_Mm02_00424289 | Sigma      | siRNA  |
| Slc25a33 #1                       | SASI_Mm02_00332248 | Sigma      | siRNA  |
| Slc25a33 #2                       | MSS230288          | Invitrogen | siRNA  |
| Slc25a33 #3                       | MSS230289          | Invitrogen | siRNA  |
| Slc25a16#1                        | SASI_Mm01_00197283 | Sigma      | siRNA  |
| Slc25a16#2                        | SASI_Mm01_00197284 | Sigma      | siRNA  |
| Slc25a28#1                        | SASI_Mm01_00024682 | Sigma      | siRNA  |
| Slc25a28#2                        | SASI_Mm01_00024683 | Sigma      | siRNA  |
| Slc25a36#1                        | SASI_Mm01_00141849 | Sigma      | siRNA  |
| Slc25a36#2                        | SASI_Mm01_00141850 | Sigma      | siRNA  |
| Slc25a38#1                        | SASI_Mm01_00130641 | Sigma      | siRNA  |
| Slc25a38#2                        | SASI_Mm01_00130642 | Sigma      | siRNA  |
| Ass1                              | SASI_Mm01_00153169 | Sigma      | siRNA  |
| Samhd1                            | SASI_Mm01_00193980 | Sigma      | siRNA  |
| Mda5                              | SASI_Mm02_00332785 | Sigma      | siRNA  |
| Mavs                              | SASI_Mm01_00042222 | Sigma      | siRNA  |
| Rig-I                             | SASI_Mm01_00145086 | Sigma      | siRNA  |
| Drp1                              | SASI_Mm01_00125369 | Sigma      | siRNA  |
| Scrambled (Scr, negative control) | Medium GC Duplex   | Invitrogen | siRNA  |
| Yme1l                             | MSS219539          | Invitrogen | siRNA  |
| Trex1                             | EMU031351          | Sigma      | esiRNA |
| cGas                              | EMU074131          | Sigma      | esiRNA |

**Supplementary Table 3: SYBR green qRT-PCR primers used.**

| Human Gene   | Primer  | Sequence                |
|--------------|---------|-------------------------|
| HPRT         | forward | TGACTGGCAAAACAATGCA     |
|              | reverse | GGTCCTTTTCACCAGCAAGCT   |
| IFI44        | forward | CAGAAATGGAACTAGGACTATG  |
|              | reverse | TCTTCGCATCGAAAACTTC     |
| ISG15        | forward | AGATCACCCAGAAGATCG      |
|              | reverse | TGTTATTCTCACCAGGATGT    |
| IFIT2        | forward | ACCATGAGTGAGAACAAGAAT   |
|              | reverse | TTAGATAGGCCAGTAGGTTG    |
| CAD          | forward | TAGTCCTGGCTCTGGCGTCTA   |
|              | reverse | TAGTCGGTGCTGACTGTCTCTG  |
| CCCR2        | forward | CAGGTGACAGAGACTCTTGGGA  |
|              | reverse | GGCAATCCTACAGCCAAGAGCT  |
| DDIT4L       | forward | CTATCACCCAGAGAGCCTGCTA  |
|              | reverse | GGACAGACAGTTCTCCAGCATTT |
| IGFBP5       | forward | CGTGCTGTGTACCTGCCAATT   |
|              | reverse | ACTTGTCCACGCACCAGCAGAT  |
| nuclearActin | forward | AACAGACTCCCCATCCCAAG    |
|              | reverse | CCAGAGGCGTACAGGGATAG    |
| mtDloop      | forward | GTCCCTTGACCACCATCCTC    |
|              | reverse | GTAGCACTCTTGTGCGGGAT    |
| mtCYTB       | forward | AGACAGTCCCACCCTCACAC    |
|              | reverse | GGTGATTCCTAGGGGGTTGT    |

| Mouse Gene | Primer  | Sequence                    |
|------------|---------|-----------------------------|
| Cgas       | forward | GTGAGGACCAATCTAAGACGAG      |
|            | reverse | AGCATGTTTTCTCTATCCCGTG      |
| Mda5       | forward | ACAGTGAAAGAGAATCTTGG        |
|            | reverse | CTGCTCATAATGTTGGGTTTC       |
| Trex1      | forward | ATCTTCTTAGACCTGGAAGC        |
|            | reverse | CCTGAGAAATGGAAGTGTTTC       |
| Zbp1       | forward | TGTTGACTTGAGCACAGGAG        |
|            | reverse | TTCAGGCGGTAAAGGACTTG        |
| Mx1        | forward | GACCATAGGGGTCTTGACCAA       |
|            | reverse | AGACTTGCTCTTTCTGAAAAGCC     |
| Isg15      | forward | CTAGAGCTAGAGCCTGCAG         |
|            | reverse | AGTTAGTCACGGACACCAG         |
| Ifi44      | forward | CTGATTACAAAAGAAGACATGACAGAC |
|            | reverse | AGGCAAAACCAAAGACTCCA        |
| Ifi47      | forward | GAACAGAAAGCCAAACCCATAG      |
|            | reverse | GAAATCAAACGCACCCAGATC       |
| Usp18      | forward | GAGAGGACCATGAAGAGGA         |
|            | reverse | TAAACCAACCAGACCATGAG        |
| Yme11      | forward | CCAGTTTTTCATACAGTCTCGGG     |
|            | reverse | CTCAAGATCTGTTCTCTGTCC       |

|              |                    |                           |
|--------------|--------------------|---------------------------|
| Hprt         | forward            | TCCTCCTCAGACCGCTTTT       |
|              | reverse            | CATAACCTGGTTCATCATCGC     |
| Rig-I        | forward            | TTGAAAGACTTGGGTACAAC      |
|              | reverse            | TCATCAGAGTGAAGACAGAC      |
| Mavs         | forward            | CAGTAGAGAATTCAGAGCAAC     |
|              | reverse            | TTAGGAGAGGGTATCAAAGAG     |
| Bak          | forward            | TGATATTAACCGGCGCTACG      |
|              | reverse            | AGCTGATGCCACTCTTAAATAGG   |
| Ass1         | forward            | CGAAATGATCTGATGGAGTATG    |
|              | reverse            | CTTGATTCTTGGGGTTTTC       |
| Samhd1       | forward            | AAGTGGAGTACAAGGTCAAG      |
|              | reverse            | GATTTCCAACCTCCTTTTCTC     |
| Sting        | forward            | CTCATTGTCTACCAAGAACC      |
|              | reverse            | TAACCTCCTCCTTTTCTTCC      |
| Bax          | forward            | CCTTTTTGCTACAGGGTTTC      |
|              | reverse            | ATATTGCTGTCCAGTTCATC      |
| Cmpk2        | forward            | AGTACTTGACCTAGTTGACC      |
|              | reverse            | CATCATCAAAGATCTTCCTCC     |
| Slc25a33     | forward            | CCTACAGGTTCTGAAATCAATC    |
|              | reverse            | CAGTATTGCTATTAGGCACG      |
| Slc25a16     | forward            | ACCCCAATGTCTTAGTTTTG      |
|              | reverse            | AATGGGTAGGATATCGTCTG      |
| Slc25a28     | forward            | CATTGAGTGACGTAATCCAC      |
|              | reverse            | TGCATCATGAAGTAATGTCTG     |
| Slc25a36     | forward            | CTCCCTCCAGAGCAATATAC      |
|              | reverse            | TCTTTATAAGCCAAATGGGG      |
| Slc25a38     | forward            | CAGACGTGATCAAACTCAC       |
|              | reverse            | CCATGGTTCTTGAAGATGAG      |
| mtCytb       | Mouse mtDNA CytB F | GCTTTCCACTTCATCTTACCATTTA |
|              | Mouse mtDNA CytB R | TGTTGGGTTGTTTGATCCTG      |
| nuclearActin | nDNA mouse ActB F  | CATTGCTGACAGGATGCAGAAGG   |
|              | nDNA mouse ActB R  | TGCTGGAAGGTGGACAGTGAGG    |
| Dloop1       | forward            | AATCTACCATCCTCCGTGAAACC   |
|              | reverse            | TCAGTTTAGCTACCCCAAGTTTAA  |
| Dloop2       | forward            | CCCTTCCCATTGGGTCT         |
|              | reverse            | TGGTTTCACGGAGGATGG        |
| Dloop3       | forward            | TCCTCCGTGAAACCAACAA       |
|              | reverse            | AGCGAGAAGAGGGGCATT        |

**Supplementary Table 4: Antibodies used.**

| <b>Protein</b>       | <b>Species</b> | <b>Company</b>                | <b>Identifier</b>                    |
|----------------------|----------------|-------------------------------|--------------------------------------|
| STAT1                | rabbit         | Cell Signaling Technology     | Cat#9172 (1:1000)                    |
| RIG-I                | rabbit         | Cell Signaling Technology     | Cat#3743 (1:500)                     |
| STING                | rabbit         | Cell Signaling Technology     | Cat#13647 (1:1000)                   |
| YME1L                | rabbit         | ProteinTech                   | Cat#11510-1-AP (1:1000)              |
| ACTIN                | mouse          | Sigma-Aldrich                 | Cat#A5441 (1:5000)                   |
| cGAS                 | rabbit         | Cell Signaling Technology     | Cat#31659 (1:500)                    |
| GAPDH                | mouse          | Santa Cruz Biotechnology Inc. | Cat#sc-32233 (1:1000)                |
| SDHA                 | mouse          | Invitrogen                    | Cat#459200 (1:2000)                  |
| Calnexin             | rabbit         | Sigma-Aldrich                 | Cat#208880 (1:1000)                  |
| SLC25A33             | rabbit         | Origene                       | Cat#TA309042 (1:1500)                |
| $\gamma$ H2AX Ser139 | mouse          | Cell Signaling Technology     | Cat#80312 (1:1000)                   |
| TOMM20               | rabbit         | Sigma-Aldrich                 | Cat#HPA011562 (1:2000 WB; 1:500 IF)) |
| Citrate Synthase     | rabbit         | ProteinTech                   | Cat#16131-1-AP (1:5000)              |
| ATP6V1A              | rabbit         | GeneTex                       | Cat#GTX110815 (1:1000)               |
| LAMINB1              | rabbit         | Abcam                         | Cat#ab16048 (1:750)                  |
| BAK                  | rabbit         | Sigma-Aldrich                 | Cat#06-536 (1:500)                   |
| BAX                  | rabbit         | Cell Signaling Technology     | Cat#2772 (1:500)                     |
| CAD                  | rabbit         | Abcam                         | Cat#ab40800 (1:1000)                 |
| CHK1                 | mouse          | Cell Signaling Technology     | Cat#2360 (1:1000)                    |
| pCHK1 Ser345         | rabbit         | Cell Signaling Technology     | Cat#2348 (1:1000)                    |
| DNA                  | mouse          | Sigma-Aldrich                 | Cat#CBL186 (1:1000)                  |
| ATP5B                | mouse          | Invitrogen                    | Cat#A21351 (1:500)                   |
