# Supplementary material for: Cellular pyrimidine imbalance triggers mitochondrial DNA–dependent innate immunity
Source: PubMed Central journal article supplement (PMC8144018; doi:10.1038/s42255-021-00385-9), 2021-04-26
Supplement: 42255_2021_385_MOESM2_ESM.pdf [file 42255_2021_385_MOESM2_ESM.pdf]

## Reporting Summary

Nature Research wishes to improve the reproducibility of the work that we publish. This form provides structure for consistency and transparency in reporting. For further information on Nature Research policies, see our [Editorial Policies](#) and the [Editorial Policy Checklist](#).

### Statistics

For all statistical analyses, confirm that the following items are present in the figure legend, table legend, main text, or Methods section.

n/a Confirmed

- |                                     |                                     |                                                                                                                                                                                                                                                            |
|-------------------------------------|-------------------------------------|------------------------------------------------------------------------------------------------------------------------------------------------------------------------------------------------------------------------------------------------------------|
| <input type="checkbox"/>            | <input checked="" type="checkbox"/> | The exact sample size ( $n$ ) for each experimental group/condition, given as a discrete number and unit of measurement                                                                                                                                    |
| <input type="checkbox"/>            | <input checked="" type="checkbox"/> | A statement on whether measurements were taken from distinct samples or whether the same sample was measured repeatedly                                                                                                                                    |
| <input type="checkbox"/>            | <input checked="" type="checkbox"/> | The statistical test(s) used AND whether they are one- or two-sided<br><i>Only common tests should be described solely by name; describe more complex techniques in the Methods section.</i>                                                               |
| <input checked="" type="checkbox"/> | <input type="checkbox"/>            | A description of all covariates tested                                                                                                                                                                                                                     |
| <input type="checkbox"/>            | <input checked="" type="checkbox"/> | A description of any assumptions or corrections, such as tests of normality and adjustment for multiple comparisons                                                                                                                                        |
| <input type="checkbox"/>            | <input checked="" type="checkbox"/> | A full description of the statistical parameters including central tendency (e.g. means) or other basic estimates (e.g. regression coefficient) AND variation (e.g. standard deviation) or associated estimates of uncertainty (e.g. confidence intervals) |
| <input type="checkbox"/>            | <input checked="" type="checkbox"/> | For null hypothesis testing, the test statistic (e.g. $F$ , $t$ , $r$ ) with confidence intervals, effect sizes, degrees of freedom and $P$ value noted<br><i>Give <math>P</math> values as exact values whenever suitable.</i>                            |
| <input checked="" type="checkbox"/> | <input type="checkbox"/>            | For Bayesian analysis, information on the choice of priors and Markov chain Monte Carlo settings                                                                                                                                                           |
| <input checked="" type="checkbox"/> | <input type="checkbox"/>            | For hierarchical and complex designs, identification of the appropriate level for tests and full reporting of outcomes                                                                                                                                     |
| <input checked="" type="checkbox"/> | <input type="checkbox"/>            | Estimates of effect sizes (e.g. Cohen's $d$ , Pearson's $r$ ), indicating how they were calculated                                                                                                                                                         |

*Our web collection on [statistics for biologists](#) contains articles on many of the points above.*

### Software and code

Policy information about [availability of computer code](#)

Data collection

Data analysis

For manuscripts utilizing custom algorithms or software that are central to the research but not yet described in published literature, software must be made available to editors and reviewers. We strongly encourage code deposition in a community repository (e.g. GitHub). See the Nature Research [guidelines for submitting code & software](#) for further information.

### Data

Policy information about [availability of data](#)

All manuscripts must include a [data availability statement](#). This statement should provide the following information, where applicable:

- Accession codes, unique identifiers, or web links for publicly available datasets
- A list of figures that have associated raw data
- A description of any restrictions on data availability

All data and materials are available from the corresponding author upon reasonable request. Proteomics from WT versus Yme1l<sup>-/-</sup> MEFs and WT vs NYKO retinas have been deposited to the ProteomeXchange Consortium via the PRIDE partner repository and are accessed via their respective dataset identifiers; PXD018097 and PXD019849. All transcriptomic data have been deposited to the GEO omnibus under the SuperSeries accession number GSE161736, which contains the following RNA-seq experiments: SLC25A33 overexpressing HeLa cells in the presence and absence of ddc (GSE161732); HeLa cells depleted of CAD in the presence

and absence of ddC (GSE161733); MEFs treated with scrambled or Yme1l siRNA (GSE161734); WT versus Yme1l<sup>-/-</sup> MEFs (GSE161735). Uniprot database is accessible via <https://www.uniprot.org> and the Interferome database via <http://www.interferome.org>.

## Field-specific reporting

Please select the one below that is the best fit for your research. If you are not sure, read the appropriate sections before making your selection.

Life sciences  Behavioural & social sciences  Ecological, evolutionary & environmental sciences

For a reference copy of the document with all sections, see [nature.com/documents/nr-reporting-summary-flat.pdf](https://www.nature.com/documents/nr-reporting-summary-flat.pdf)

## Life sciences study design

All studies must disclose on these points even when the disclosure is negative.

|                 |                                                                                                                                                                                                                                                                                             |
|-----------------|---------------------------------------------------------------------------------------------------------------------------------------------------------------------------------------------------------------------------------------------------------------------------------------------|
| Sample size     | Sample size was chosen according to our previous experience and common standards in the field (PMID: 31695197, 30389680). No statistical method was used to predetermine sample size. The sample size included at least 3 biological replicates where statistical evaluation was performed. |
| Data exclusions | We have not excluded any samples.                                                                                                                                                                                                                                                           |
| Replication     | Experiments were repeated as detailed in the figure legends. All attempts at replication were successful. In some cases, multiple cell lines and additional siRNA sequences were used to verify the reproducibility of the findings.                                                        |
| Randomization   | Mice were assigned to experimental groups based on genotypes. Cells were allocated by genotype and treatment, e.g. cells treated with the same chemical or siRNA were allocated to the same group.                                                                                          |
| Blinding        | Analyses were not blinded because experiments were performed and analyzed by the same researchers.                                                                                                                                                                                          |

## Reporting for specific materials, systems and methods

We require information from authors about some types of materials, experimental systems and methods used in many studies. Here, indicate whether each material, system or method listed is relevant to your study. If you are not sure if a list item applies to your research, read the appropriate section before selecting a response.

### Materials & experimental systems

| n/a                                 | Involved in the study                                           |
|-------------------------------------|-----------------------------------------------------------------|
| <input type="checkbox"/>            | <input checked="" type="checkbox"/> Antibodies                  |
| <input type="checkbox"/>            | <input checked="" type="checkbox"/> Eukaryotic cell lines       |
| <input checked="" type="checkbox"/> | <input type="checkbox"/> Palaeontology and archaeology          |
| <input type="checkbox"/>            | <input checked="" type="checkbox"/> Animals and other organisms |
| <input checked="" type="checkbox"/> | <input type="checkbox"/> Human research participants            |
| <input checked="" type="checkbox"/> | <input type="checkbox"/> Clinical data                          |
| <input checked="" type="checkbox"/> | <input type="checkbox"/> Dual use research of concern           |

### Methods

| n/a                                 | Involved in the study                           |
|-------------------------------------|-------------------------------------------------|
| <input checked="" type="checkbox"/> | <input type="checkbox"/> ChIP-seq               |
| <input checked="" type="checkbox"/> | <input type="checkbox"/> Flow cytometry         |
| <input checked="" type="checkbox"/> | <input type="checkbox"/> MRI-based neuroimaging |

## Antibodies

### Antibodies used

STAT1 rabbit Cell Signaling Technology Cat#9172  
RIG-I rabbit Cell Signaling Technology Cat#3743  
STING rabbit Cell Signaling Technology Cat#13647  
YME1L rabbit ProteinTech Cat#11510-1-AP  
ACTIN mouse Sigma-Aldrich Cat#A5441  
cGAS rabbit Cell Signaling Technology Cat#31659  
GAPDH mouse Santa Cruz Biotechnology Inc. Cat#sc-32233  
SDHA mouse Invitrogen Cat#459200  
Calnexin rabbit Sigma-Aldrich Cat#208880  
SLC25A33 rabbit Origene Cat#TA309042  
yH2AX Ser139 mouse Cell Signaling Technology Cat#80312  
TOMM20 rabbit Sigma-Aldrich Cat#HPA011562  
Citrate Synthase rabbit ProteinTech Cat#16131-1-AP  
ATP6V1A rabbit GeneTex Cat#GTX110815  
LAMINB1 rabbit Abcam Cat#ab16048  
BAK rabbit Sigma-Aldrich Cat#06-536  
BAX rabbit Cell Signaling Technology Cat#2772  
CAD rabbit Abcam Cat#ab40800

CHK1 mouse Cell Signaling Technology Cat#2360  
 pCHK1 Ser345 rabbit Cell Signaling Technology Cat#2348  
 DNA mouse Sigma-Aldrich Cat#CBL186  
 ATP5B mouse Invitrogen Cat#A21351  
 Alexa Fluor-568 anti-rabbit Invitrogen #A11011  
 Alexa Fluor-488 anti-mouse Invitrogen #A11001

## Validation

Validation for commercially available antibodies can be found using the links below:

STAT1 <https://www.cellsignal.de/products/primary-antibodies/stat1-antibody/9172>  
 RIG-I <https://www.cellsignal.de/products/primary-antibodies/rig-i-d14g6-rabbit-mab/3743>  
 STING <https://www.cellsignal.de/products/primary-antibodies/sting-d2p2f-rabbit-mab/13647>  
 YME1L <https://www.ptglab.com/products/YME1L1-Antibody-11510-1-AP.htm>  
 ACTIN <https://www.sigmaaldrich.com/catalog/product/sigma/a5441>  
 cGAS <https://www.cellsignal.de/products/primary-antibodies/cgas-d3o8o-rabbit-mab-mouse-specific/31659>  
 GAPDH <https://datasheets.scbt.com/sc-32233.pdf>  
 Calnexin <https://www.sigmaaldrich.com/catalog/product/mm/208880?lang=de&region=DE>

SLC25A33 <https://cdn.origene.com/datasheet/ta309042.pdf>. We validated this antibody further in the lab using Slc25a33 knockdown and overexpression cell lines.

yH2AX Ser139 <https://www.cellsignal.com/products/primary-antibodies/phospho-histone-h2a-x-ser139-d7t2v-mouse-mab/80312>  
 TOMM20 <https://www.sigmaaldrich.com/catalog/product/sigma/hpa011562>  
 Citrate Synthase <https://www.ptglab.com/Products/Pictures/pdf/16131-1-AP.pdf>  
 ATP6V1A <https://www.genetex.com/PDF/Download?catno=GTX110815>  
 LAMINB1 <https://www.abcam.com/lamin-b1-antibody-nuclear-envelope-marker-ab16048.pdf>  
 BAK <https://www.sigmaaldrich.com/catalog/product/mm/06536?>  
 BAX <https://www.cellsignal.de/products/primary-antibodies/bax-antibody/2772>  
 CAD <https://www.abcam.com/cadbm1-antibody-ep710y-ab40800.html>  
 CHK1 <https://www.cellsignal.de/products/primary-antibodies/chk1-2g1d5-mouse-mab/2360>  
 p-CHK1 <https://www.cellsignal.de/products/primary-antibodies/phospho-chk1-ser345-133d3-rabbit-mab/2348>  
 DNA <https://www.sigmaaldrich.com/catalog/product/mm/cbl186?lang=de&region=DE>  
 ATP5B [https://www.thermofisher.com/order/genome-database/dataSheetPdf?producttype=antibody&productsubtype=antibody\\_primary&productId=A-21351&version=105](https://www.thermofisher.com/order/genome-database/dataSheetPdf?producttype=antibody&productsubtype=antibody_primary&productId=A-21351&version=105)

## Eukaryotic cell lines

Policy information about [cell lines](#)

## Cell line source(s)

HeLa (CCL-2) cells were purchased from ATCC. MEFs were described in PMID: 24616225. HEK293T cells were described in PMID: 31695197 but only used for virus production and no biological interpretations were based on HEK293T cells. Further cell line details are included in the Methods section.

## Authentication

None of the cell lines were authenticated.

## Mycoplasma contamination

All cell lines were routinely tested for mycoplasma by PCR. All cell lines were negative.

Commonly misidentified lines  
(See [ICLAC](#) register)

No commonly misidentified cell lines were used.

## Animals and other organisms

Policy information about [studies involving animals](#); [ARRIVE guidelines](#) recommended for reporting animal research

## Laboratory animals

C57BL/6N mice, male and female 6-7 or 31-32 week old mice

## Wild animals

No wild animals.

## Field-collected samples

No samples collected from the field.

## Ethics oversight

All animal procedures were carried out in accordance with European, national and institutional guidelines and were approved by local authorities (Landesamt für Natur, Umwelt, und Verbraucherschutz Nordrhein-Westfalen, Germany; approval number: 84-02.04.2014.A418).

Note that full information on the approval of the study protocol must also be provided in the manuscript.
